# Supplementary material for: A highly sensitive and selective visible-light excitable luminescent probe for singlet oxygen based on a dinuclear ruthenium complex
Source: Royal Society of Chemistry journal article supplement (doi:10.1039/c6dt04813g), 2017-01-01
Supplement: c6dt04813g1.pdf [file c6dt04813g1.pdf]

Supporting information for

**A highly sensitive and selective visible-light excitable luminescence probe for singlet oxygen based on a dinuclear ruthenium complex**

Hong-Ju Yin,<sup>a,b</sup> Yan-Ju Liu,<sup>a</sup> Jie Gao,<sup>a</sup> and Ke-Zhi Wang<sup>a,\*</sup>

<sup>a</sup>*Beijing Key Laboratory of Energy Conversion and Storage Materials, College of Chemistry, Beijing Normal University, Beijing 100875, P.R. China*

<sup>b</sup>*College of Chemistry and Chemical Engineering, Qujing Normal University, Qujing 655000, P.R. China*

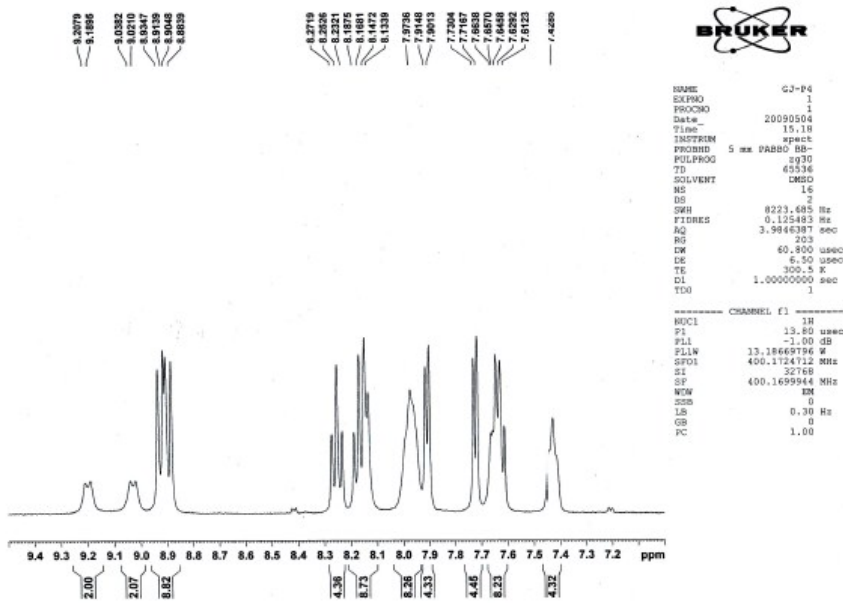

(a)

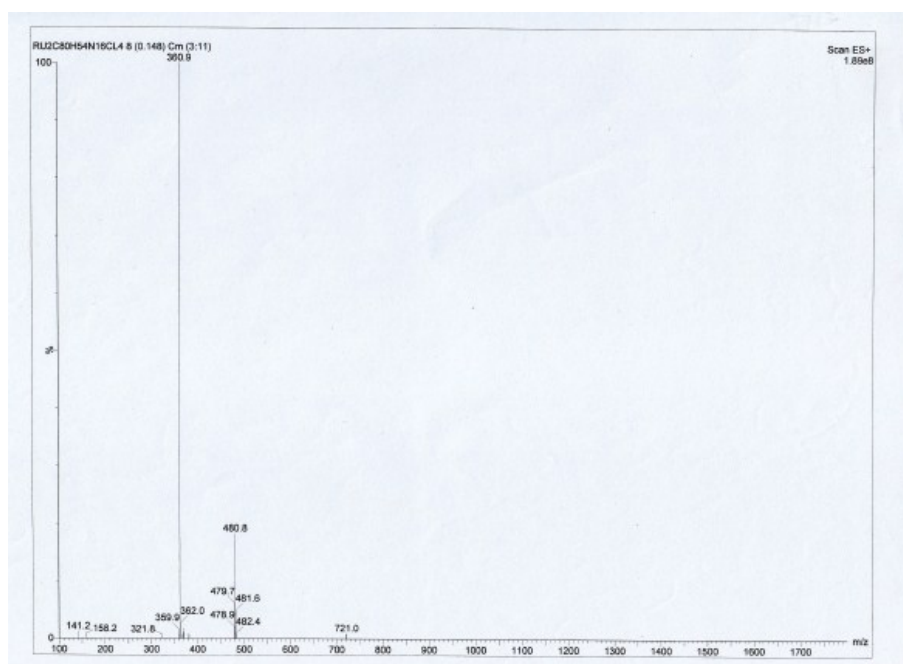

(b)

**Fig.S1.**  $^1\text{H}$  NMR spectrum (a) and MALDI-TOF spectrum (b) of  $[(\text{bpy})_2\text{Ru}(\text{H}_2\text{ipaip})\text{Ru}(\text{bpy})_2]\text{Cl}_4$ .

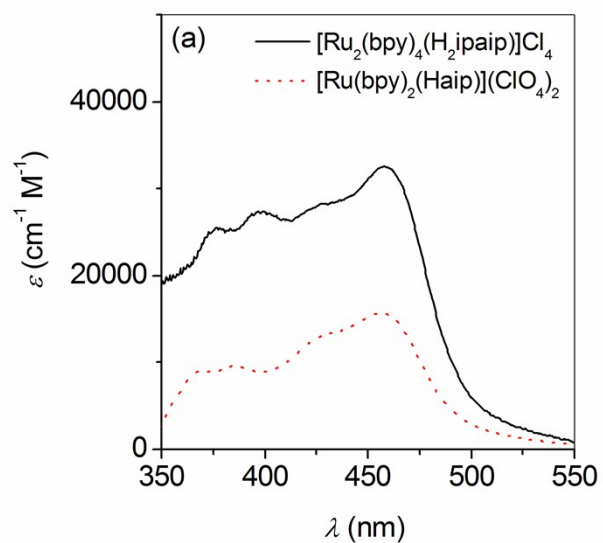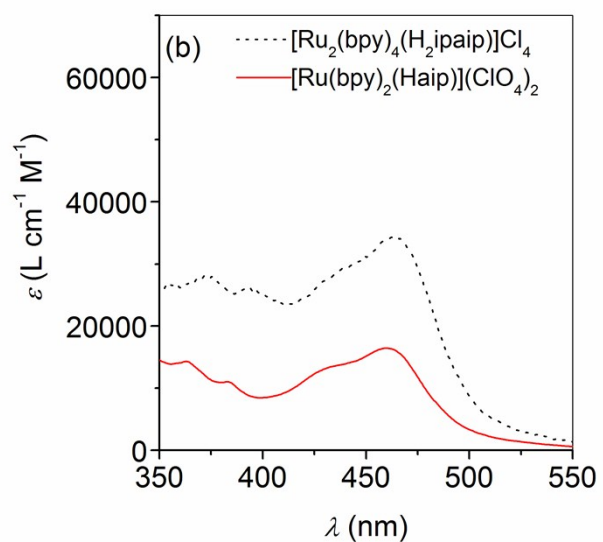

**Fig.S2.** UV/Vis absorption spectra of  $[(\text{bpy})_2\text{Ru}(\text{H}_2\text{ipaip})\text{Ru}(\text{bpy})_2]\text{Cl}_4$  and  $[\text{Ru}(\text{bpy})_2(\text{Haip})](\text{ClO}_4)_2$  in (a) 50 mM Tris-HCl buffer of pH 7.00, and (b) in 0.1 M carbonate buffer of pH 10.5.

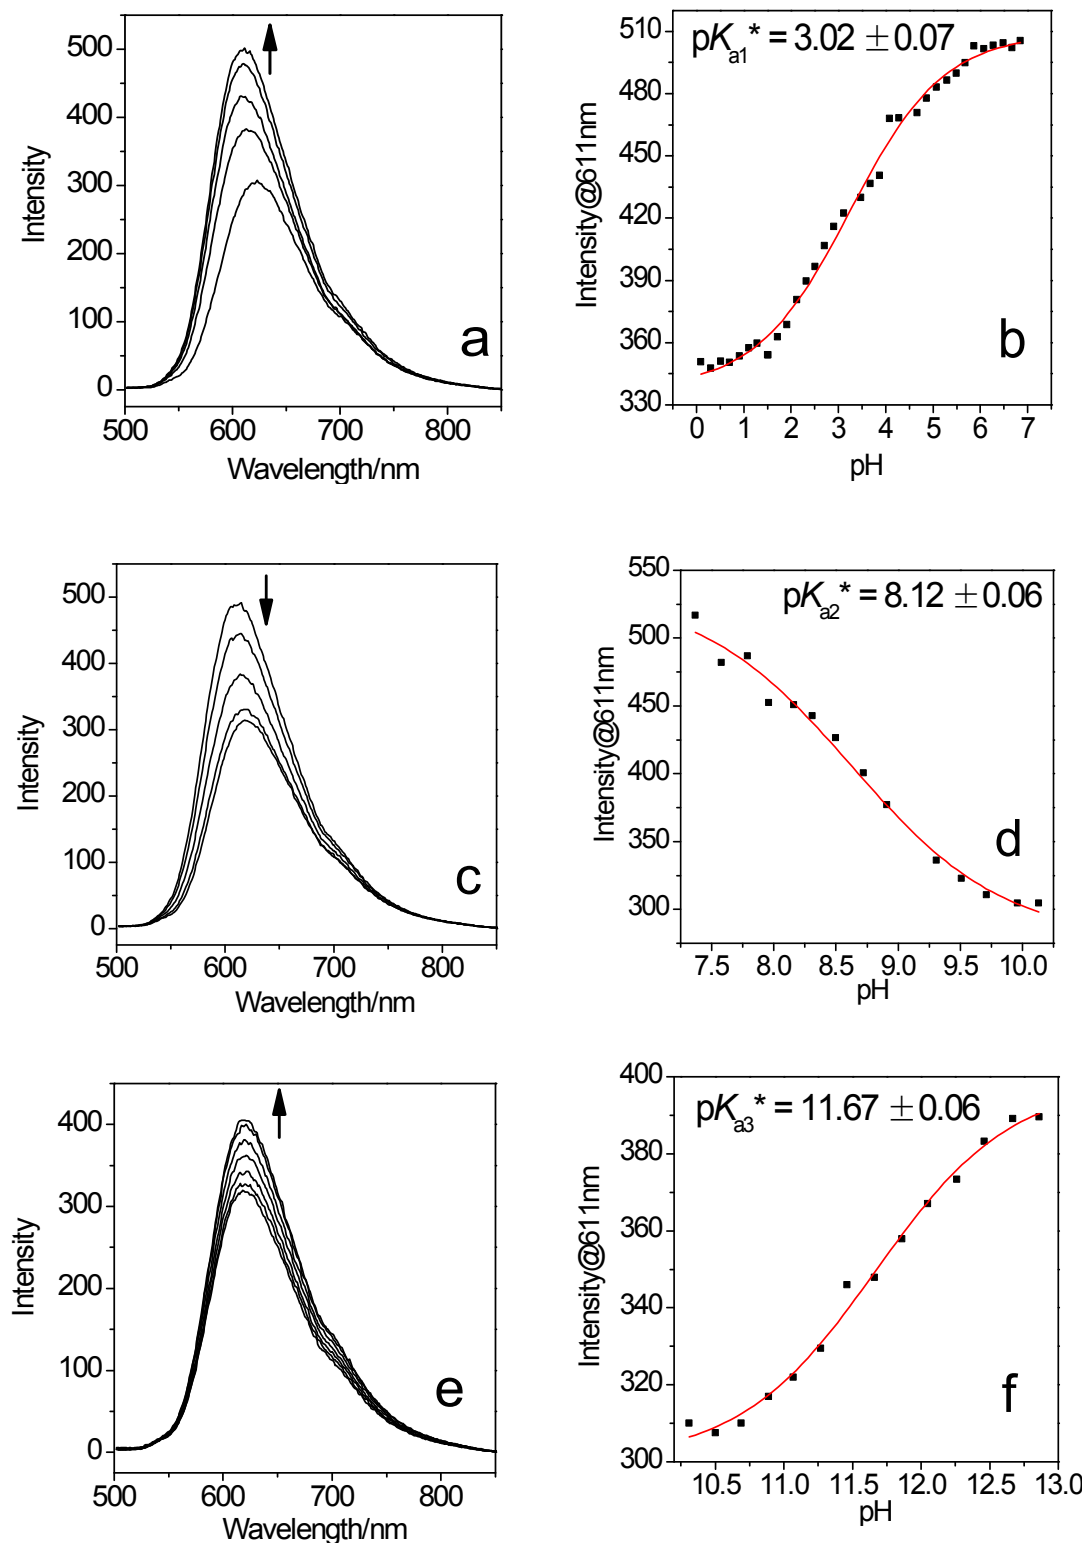

**Fig. S3.** Changes in emission spectra of  $[(bpy)_2Ru(H_2ipaip)Ru(bpy)_2]Cl_4$  (5.0  $\mu M$ ) upon increasing pH from 0.0 to 7.0 (a), from 7.0 to 10.25 (c) and from 10.25 to 12.75 (e) along with the plots (b,d,f) of emission intensities at 611 nm vs. the corresponding pH respectively.

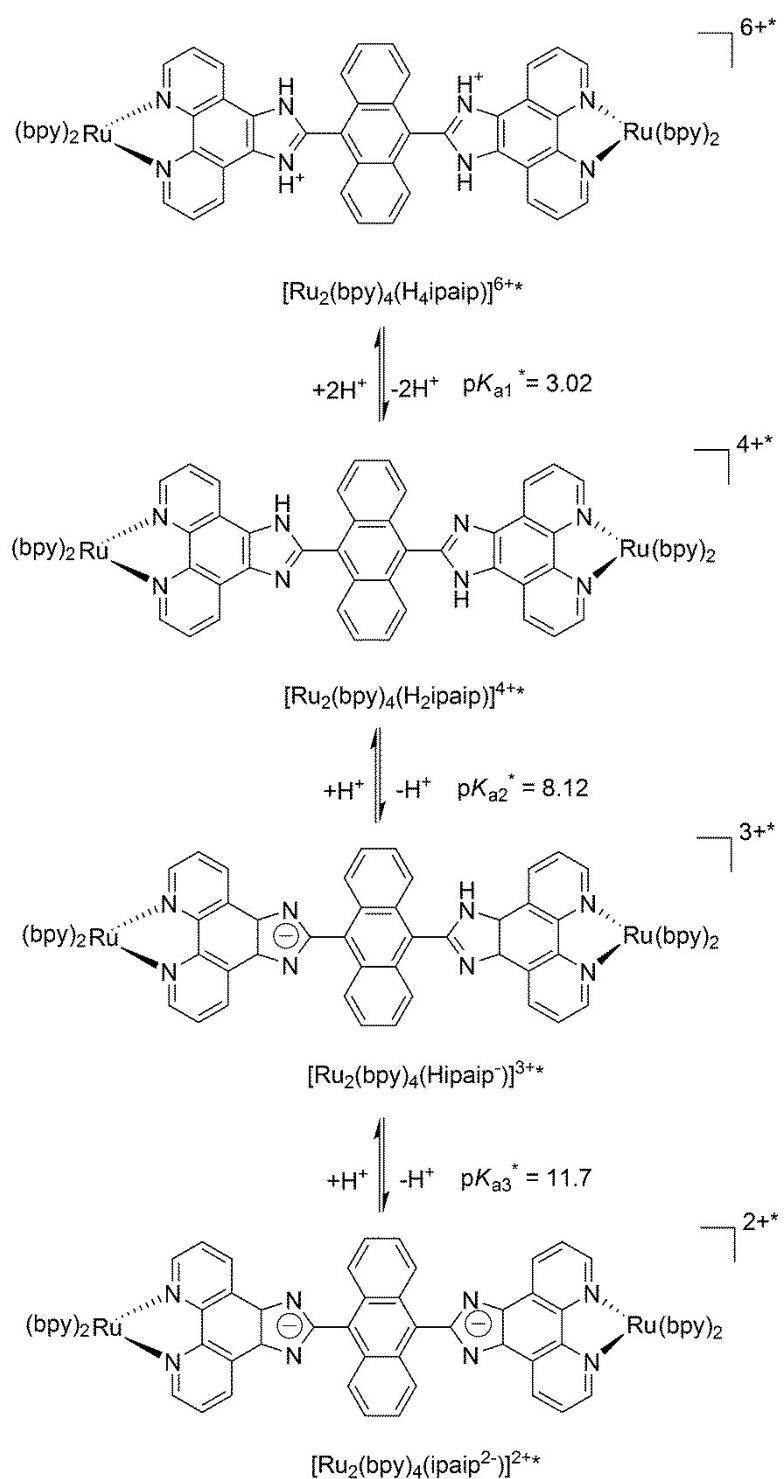

**Scheme S4.** Excited-state protonation/deprotonation processes of  $[\text{Ru}_2(\text{bpy})_4(\text{H}_2\text{ipaip})]^{4+*}$ .
